# Supplementary material for: Evaluation of Human Platelet Lysate as an Alternative to Fetal Bovine Serum for Potential Clinical Applications of Stem Cells from Human Exfoliated Deciduous Teeth
Source: MDPI journal article supplement (doi:10.3390/cells13100847), 2024-05-16
Supplement: s1 [file s1]

**A**

SHED  
(Incisor, 6YR, F)

Primary culture: FBS 15%  
Stock (Passage 3): FBS 15%  
Cell seeding: Culture (Passage 5)  
CCK, Live & Dead

0 2 4 6 days

10% FBS  
15% FBS  
2% hPL  
5% hPL  
7.5% hPL  
10% hPL

**B**

Live/Dead

Day 2  
Day 4  
Day 6

10% FBS 15% FBS 2% hPL 5% hPL 7.5% hPL 10% hPL

**C**

Cell viability (%)

1.6×10<sup>3</sup>  
1.4×10<sup>3</sup>  
1.2×10<sup>3</sup>  
1.0×10<sup>3</sup>  
8×10<sup>2</sup>  
500  
400  
300  
100

10%FBS  
15%FBS  
2%hPL  
5%hPL  
7.5%hPL  
10%hPL

Day 2 Day 4 Day 6

\*\*\*\*  
\*\*\*\*  
\*\*\*\*  
\*\*\*\*  
\*\*\*\*  
\*

**Table S1.** Primer sequences used in the qRT-PCR

| Name             | Forward                        | Reverse                        |
|------------------|--------------------------------|--------------------------------|
| COL1A            | 5'-CGTGACCAAAAACCAAAAGTGC-3'   | 5'-GGGTGGAGAAAGGAACAGAAA-3'    |
| ALP              | 5'-ACACCTTGACTGTGGTTACT-3'     | 5'-CCTTGTAGCCAGGCCCGTTA-3'     |
| DMP1             | 5'-GGACGGCTCTGAGTTCGA-3'       | 5'-TGGGTTTCCCTGCTGTTG-3'       |
| DSPP             | 5'-AGAAGGACCTGGCCAAAAAT-3'     | 5'-TCTCCTCGGCTACTGCTGTT-3'     |
| OCN              | 5'-AGACTCCGGCGCTACCTCAACAAT-3' | 5'-CAGCTGTGCCGTCCATACT-3'      |
| RUNX2            | 5'-GACCGACACAGCCATATAAA-3'     | 5'-TCCCTAACCTGAAACCAAAG-3'     |
| PPAR- $\gamma$ 2 | 5'- AGCCTGCGAAAGCCTTTTGGTG-3'  | 5'-GGCTTCACATTCAGCAAACCTGG -3' |
| FABP4            | 5'- ACGAGAGGATGATAAACTGGTGG-3' | 5'-GCGAACTTCAGTCCAGGTCAAC -3'  |
| LPL              | 5'-CTGCTGGCATTGCAGGAAGTCT-3'   | 5'-CATCAGGAGAAAAGACGACTCGG-3'  |
| Col-IIA          | 5'-GTGACAAAGGAGAGGCTGGA-3'     | 5'-ACCTCTAGGGCCAGAAGGAC-3'     |
| SOX9             | 5'-ATCTGAAGAAGACTGCGAG-3'      | 5'-TCAGAAGTCTCCAGAGCTTG-3'     |
| ACAN             | 5'-CTGCTTCCGAGGCATTTTCAG-3'    | 5'-CTTGGGTCACGATCCACTCC-3'     |
| MASH-1           | 5'-CCAGTTGTACTTCAGCACC-3'      | 5'-TGCCACTTTGAGTTTGGAC-3'      |
| NeuroD           | 5'-CCACGGATCAATCTTCTCAG-3'     | 5'-CATGATGTGAATGGCTATCG-3'     |
| Nestin           | 5'-GCCCTGACCACTCCAGTTA-3'      | 5'-GGAGTCCTGGATTTCTTCC-3'      |
| GFAP             | 5'-GAGCACAAGGATGTGATGT-3'      | 5'-AGAGGCGGAGCAACTAT-3'        |
| $\beta$ -tubulin | 5'-GAAGCCAGCAGTGTCTAAA-3'      | 5'-GAGGACGAGGCCATAAATAC-3'     |
| GAPDH            | 5'-GAGCATCTCCCTCACAATTT-3'     | 5'-GGGTGCAGCGAACTTTAT-3'       |
